# Supplementary material
Source: PubMed Central journal article supplement (PMC3607020)
Supplement: 1222003110_pnas.201222003SI.pdf [file 1222003110_pnas.201222003SI.pdf]

# Supporting Information

Hoshi et al. 10.1073/pnas.1222003110

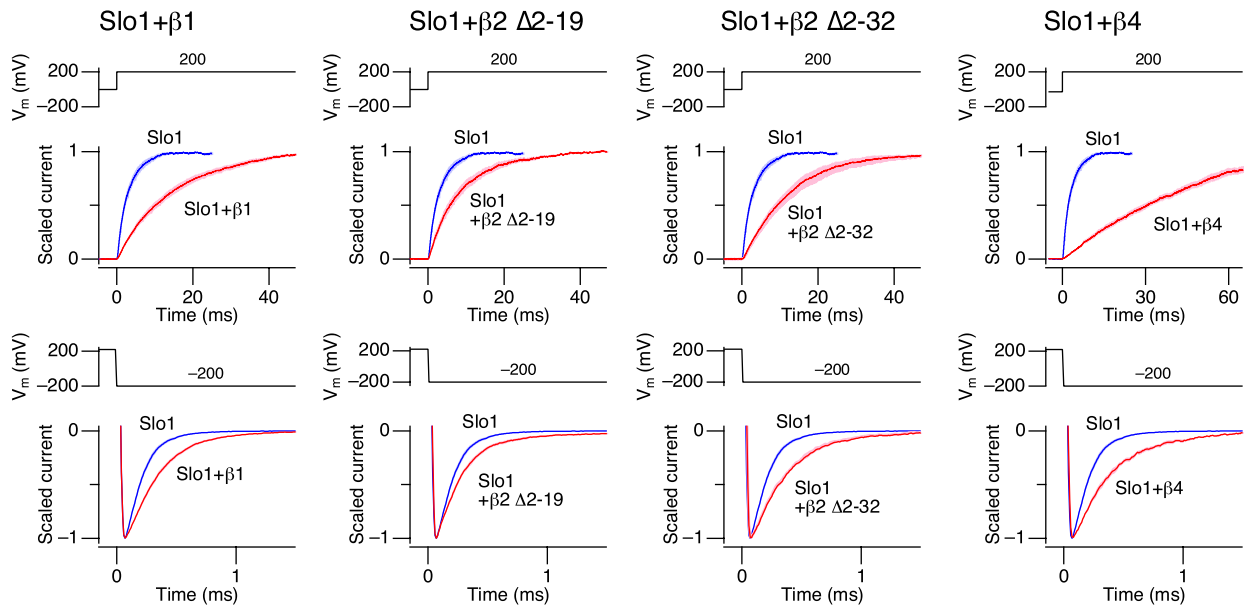

**Fig. S1.** Characteristic changes in activation and deactivation kinetics induced by  $\beta 1$ ,  $\beta 2 \Delta 2-19$ ,  $\beta 2 \Delta 2-32$ , and  $\beta 4$ . For each channel type, scaled mean currents at 200 (*Upper*) and  $-200$  mV (*Lower*) are shown in red and the currents obtained from Slo1 alone shown in blue. Trace width represents mean  $\pm$  SEM,  $n = 4-12$ . All results shown were obtained in the virtual absence of  $\text{Ca}^{2+}$ .

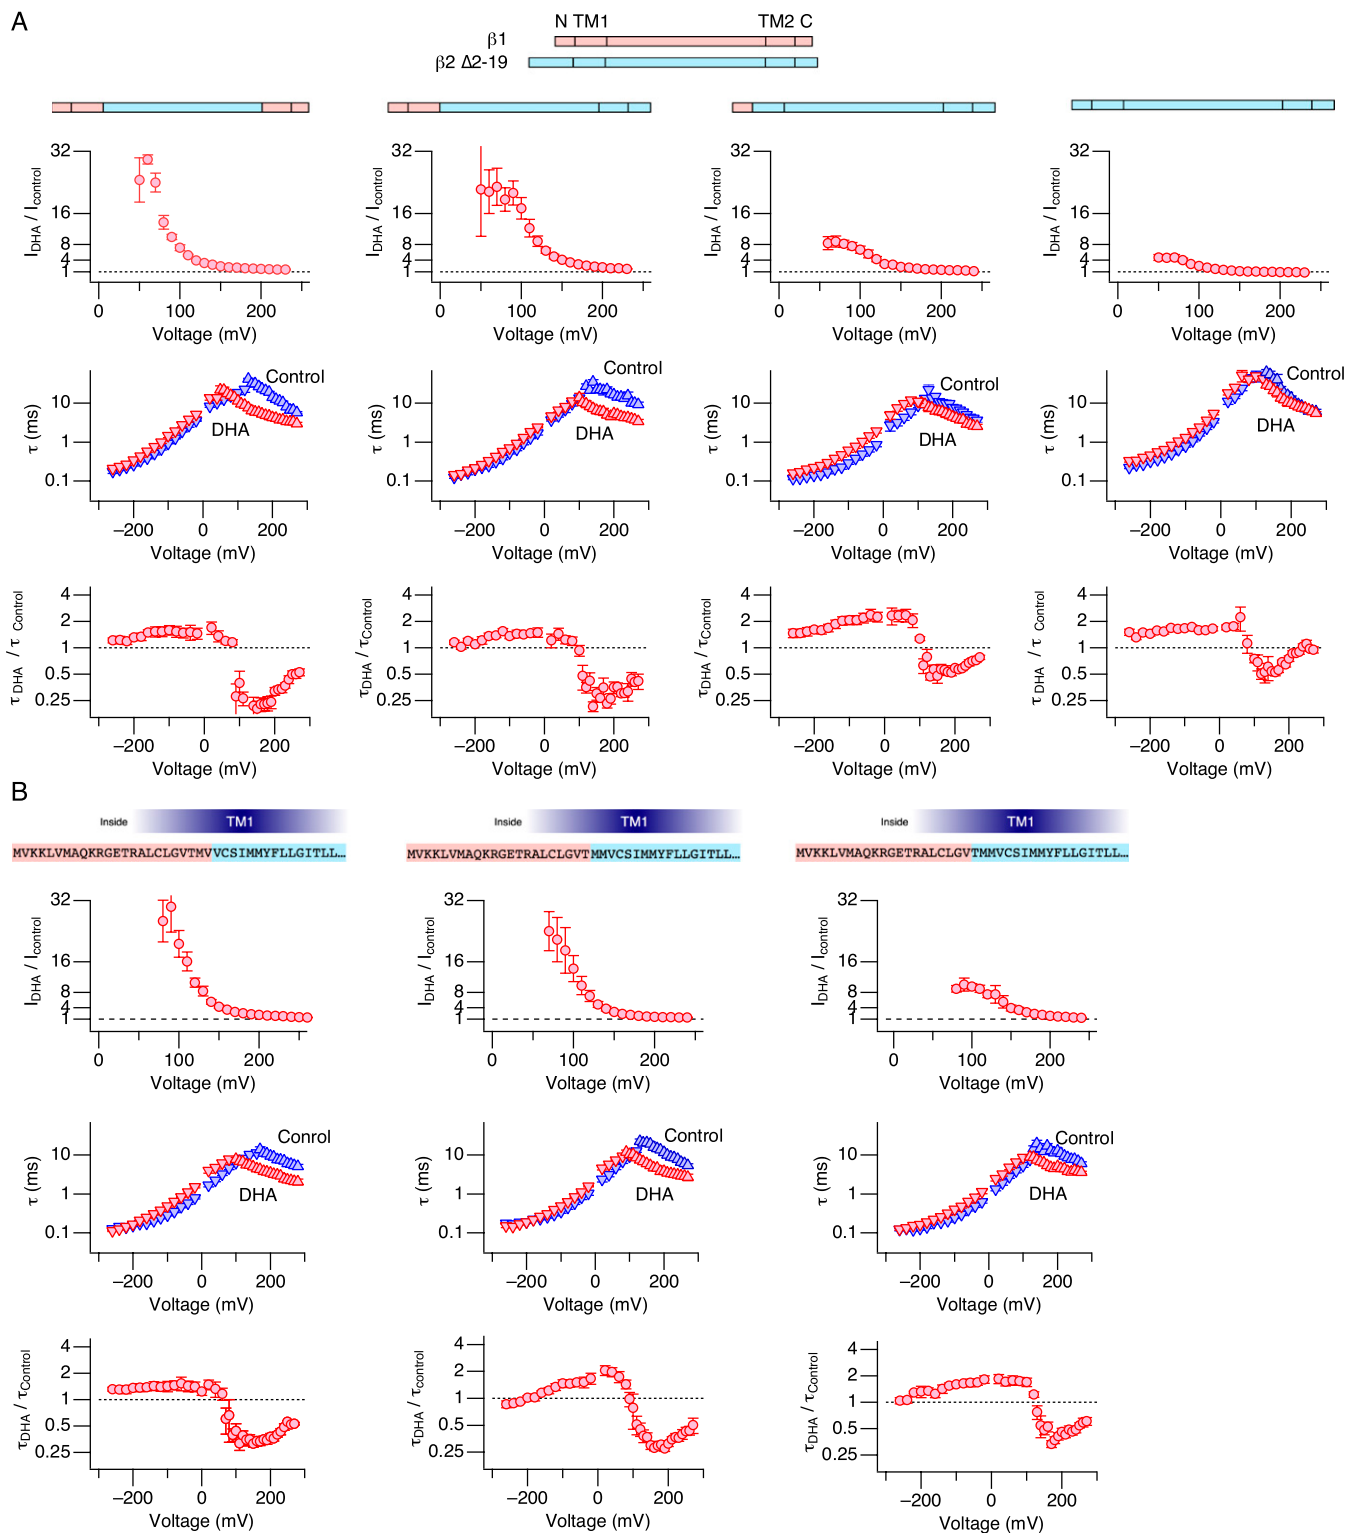

**Fig. S2.** Gating changes by docosahexaenoic acid (DHA) in Slo1 channel complexes containing  $\beta 1$ - $\beta 2$  chimeric constructs. Fractional increases in peak current size (*Top*), time constants of current relaxation (*Middle*), and fractional increases in time constant of current relaxation (*Bottom*) by DHA (3  $\mu$ M) are depicted for various chimeric constructs covering whole  $\beta 1$  and  $\beta 2$  (*A*) and the N terminus and TM1 (*B*). Structural organizations of the chimeric constructs are schematically illustrated at the *Top* in each panel. Pink segments are from  $\beta 1$  and the light blue segments are from  $\beta 2$ .  $n = 4-10$ . All results shown were obtained in the virtual absence of  $Ca^{2+}$ .
